# Supplementary material for: Oxygen vacancy enhanced catalytic oxidation of H2S based on ZnO-incorporated N-doped hollow carbon nanofibers for cathode construction for high-performance Li–S batteries
Source: Royal Society of Chemistry journal article supplement (doi:10.1039/d4ta04138k), 2024-01-01
Supplement: d4ta04138k1.pdf [file d4ta04138k1.pdf]

## *Supporting Information*

# Oxygen Vacancy Enhanced Catalytic Oxidation of H<sub>2</sub>S Based on ZnO Incorporated N-doped Hollow Carbon Nanofibers for Cathodes Construction of High-performance Li-S Batteries

Minghui Sun<sup>a</sup>, Xuzhen Wang<sup>\*, a,b</sup>, Xingliang Ji<sup>a</sup>, Lei Qin<sup>b</sup>, Zongbin Zhao<sup>c</sup>, Jieshan Qiu<sup>d</sup>

<sup>a</sup> School of Chemistry, Liaoning Key Laboratory for Energy Materials and Chemical Engineering, Dalian University of Technology, Dalian 116024, China.

<sup>b</sup> Key Laboratory of Interface Science and Engineering in Advanced Materials (Taiyuan University of Technology), Ministry of Education, Taiyuan 030024, China. & Shanxi-Zheda Institute of Advanced Materials and Chemical Engineering, Taiyuan University of Technology, Taiyuan 030000, China.

<sup>c</sup> School of Chemical Engineering, Liaoning Key Laboratory for Energy Materials and Chemical Engineering, Dalian University of Technology, Dalian 116024, China.

<sup>d</sup> College of Chemical Engineering, State Key Laboratory of Chemical Resource Engineering, Beijing University of Chemical Technology, Beijing 100029, China

**Corresponding author:** Xuzhen Wang, *E-mail:* xzwang@dlut.edu.cn.

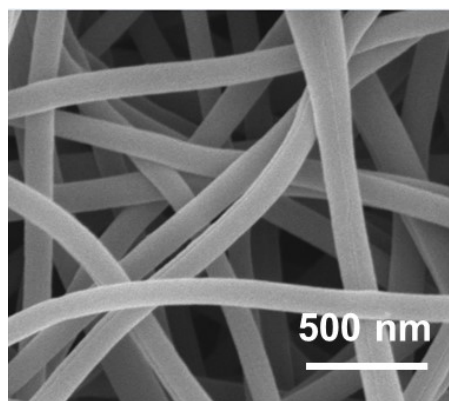

**Figure S1.** SEM image of precursor PMMA/Zn(Ac)<sub>2</sub> composites.

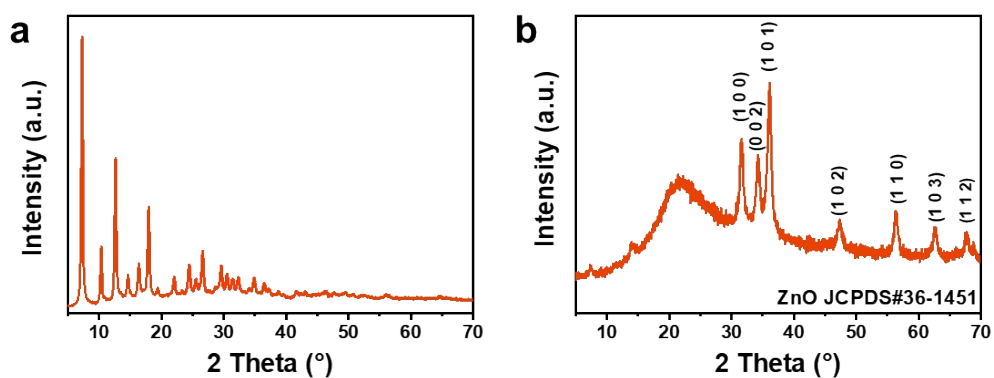

**Figure S2.** XRD patterns of (a) PMMA@Zn-ZIF and (b) O<sub>d</sub>-ZnO/NHCFs samples.

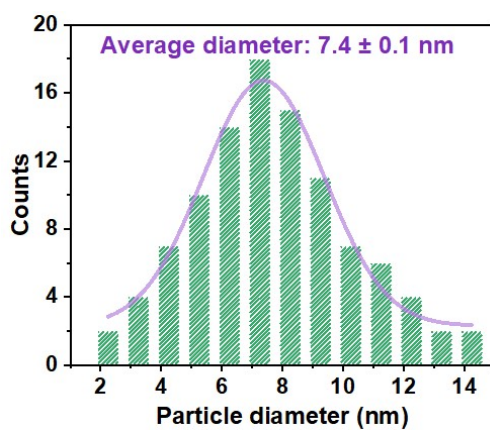

**Figure S3.** The statistical graph of ZnO nanoparticle size distribution in O<sub>d</sub>-ZnO/NHCFs.

**Table S1.** Zn content (by ICP determination) in the samples after treated with different concentration of HCl solutions and the calculated ZnO loading amount in the materials.

| Content (wt%) | Acid treatment condition |       |       |       |            |
|---------------|--------------------------|-------|-------|-------|------------|
|               | 0.1 M                    | 0.2 M | 0.5 M | 1 M   | 1 M (12 h) |
| Zn            | 40.32                    | 28.52 | 20.29 | 9.69  | \          |
| ZnO           | 50.24                    | 35.54 | 25.28 | 12.06 | \          |

**Table S2.** Modulation of VOs in O<sub>d</sub>-ZnO/NHCFs by changing the flow rate of H<sub>2</sub> and their corresponding saturated capacity of H<sub>2</sub>S ( $Q_s$ ).

| Sample                          | Flow rate of H <sub>2</sub><br>(sccm) | VOs (%)<br>(XPS) | $Q_s$<br>(g H <sub>2</sub> S/ g cat.) |
|---------------------------------|---------------------------------------|------------------|---------------------------------------|
| ZnO/NHCFs                       | -                                     | 23.9             | 2.66                                  |
| O <sub>d3</sub> -ZnO/NHCFs      | 5                                     | 37.2             | 3.70                                  |
| O <sub>d2</sub> -ZnO/NHCFs      | 10                                    | 40.6             | 4.15                                  |
| <b>O<sub>d1</sub>-ZnO/NHCFs</b> | <b>20</b>                             | <b>50.3</b>      | <b>4.64</b>                           |
| O <sub>d4</sub> -ZnO/NHCFs      | 50                                    | 31.6             | 3.08                                  |

**Table S3.** Results from UPS spectra in the cutoff ( $E_{\text{cutoff}}$ ), and the onset ( $E_i$ ) energy regions of different samples. The ionization energy values (numerically equal to the work function ( $\Phi$ ) of materials) of ZnO before and after desulfurization were determined by the equation of  $\Phi = 21.20 \text{ eV} - (E_{\text{cutoff}} - E_i)$ .

| Sample                    | $E_{\text{cutoff}}/\text{eV}$ | $E_i/\text{eV}$ | $\Phi/\text{eV}$ |
|---------------------------|-------------------------------|-----------------|------------------|
| ZnO                       | 18.34                         | 1.34            | 4.20             |
| ZnO after desulfurization | 18.57                         | 1.69            | 4.32             |
| ZnS                       | 18.83                         | 2.03            | 4.40             |

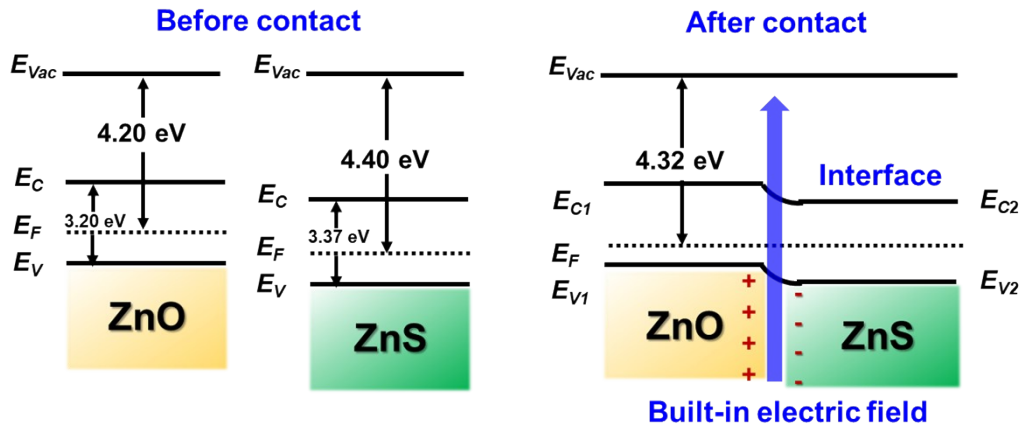

**Figure S4.** Schematic diagram of the difference in value of  $\Phi$  between ZnO and ZnS due to the construction of heterostructure.

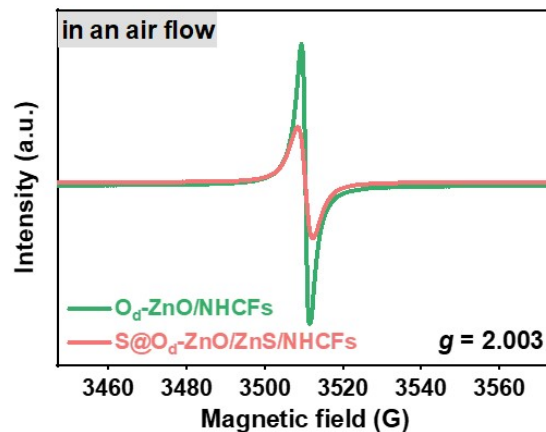

**Figure S5.** EPR spectra of fresh  $O_d$ -ZnO/NHCFs and the spent  $S@O_d$ -ZnO/ZnS/NHCFs.

**Table S4.** Elemental contents in various spent catalysts after elemental S removal.

| Sample                                   | Elemental content (wt%) |              | Sulfidation degree (%) | ZnO/ZnS     |
|------------------------------------------|-------------------------|--------------|------------------------|-------------|
|                                          | S                       | Zn (ICP)     |                        |             |
| ZnO/ZnS/NHCFs                            | 1.63                    | 28.43        | 11.65                  | 7.58        |
| $O_{d3}$ -ZnO/ZnS/NHCFs                  | 5.09                    | 27.21        | 38.00                  | 1.63        |
| $O_{d2}$ -ZnO/ZnS/NHCFs                  | 6.45                    | 26.78        | 48.92                  | 1.04        |
| <b><math>O_{d1}</math>-ZnO/ZnS/NHCFs</b> | <b>7.18</b>             | <b>25.99</b> | <b>56.12</b>           | <b>0.78</b> |
| $O_{d4}$ -ZnO/ZnS/NHCFs                  | 3.38                    | 27.69        | 24.79                  | 3.03        |

**Table S5.** Elemental contents in spent catalysts with different desulfurization duration after elemental S removal.

| Sample                                   | Desulfurization reaction time (h) | ZnO/ZnS     |
|------------------------------------------|-----------------------------------|-------------|
| <b><math>O_{d1}</math>-ZnO/ZnS/NHCFs</b> | 20                                | 2.19        |
|                                          | 25                                | 1.46        |
|                                          | <b>30</b>                         | <b>0.92</b> |
|                                          | 36                                | 0.78        |

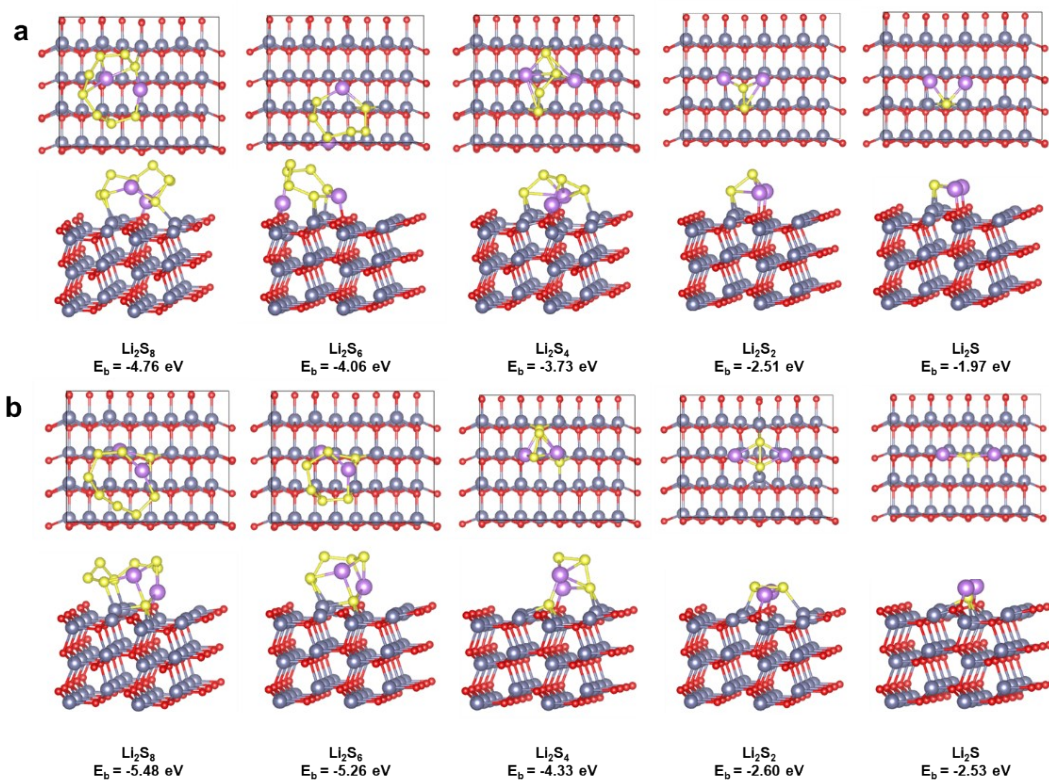

**Figure S6.** Atomic structures of  $\text{Li}_2\text{S}$ ,  $\text{Li}_2\text{S}_2$ ,  $\text{Li}_2\text{S}_4$ ,  $\text{Li}_2\text{S}_6$  and  $\text{Li}_2\text{S}_8$  adsorbed on (a) ZnO (1 0 0) and (b)  $\text{O}_d$ -ZnO (1 0 0) facets (top panels: top view; bottom panels: side view), the Zn, O, Li, S atoms are shown as spheres in grey, red, purple and yellow, respectively.
